# Supplementary material
Source: HighWire-hosted journal article supplement (https://ijgc.bmj.com/content/29/1/102)

**Appendix 1.** Preoperative algorithm for triaging patients with grade 1 endometrial adenocarcinoma to undergo lymph node dissection [14]. Deviations from this at each stage are allowed for at the surgeon’s clinical discretion and in the context of specific patient characteristics.


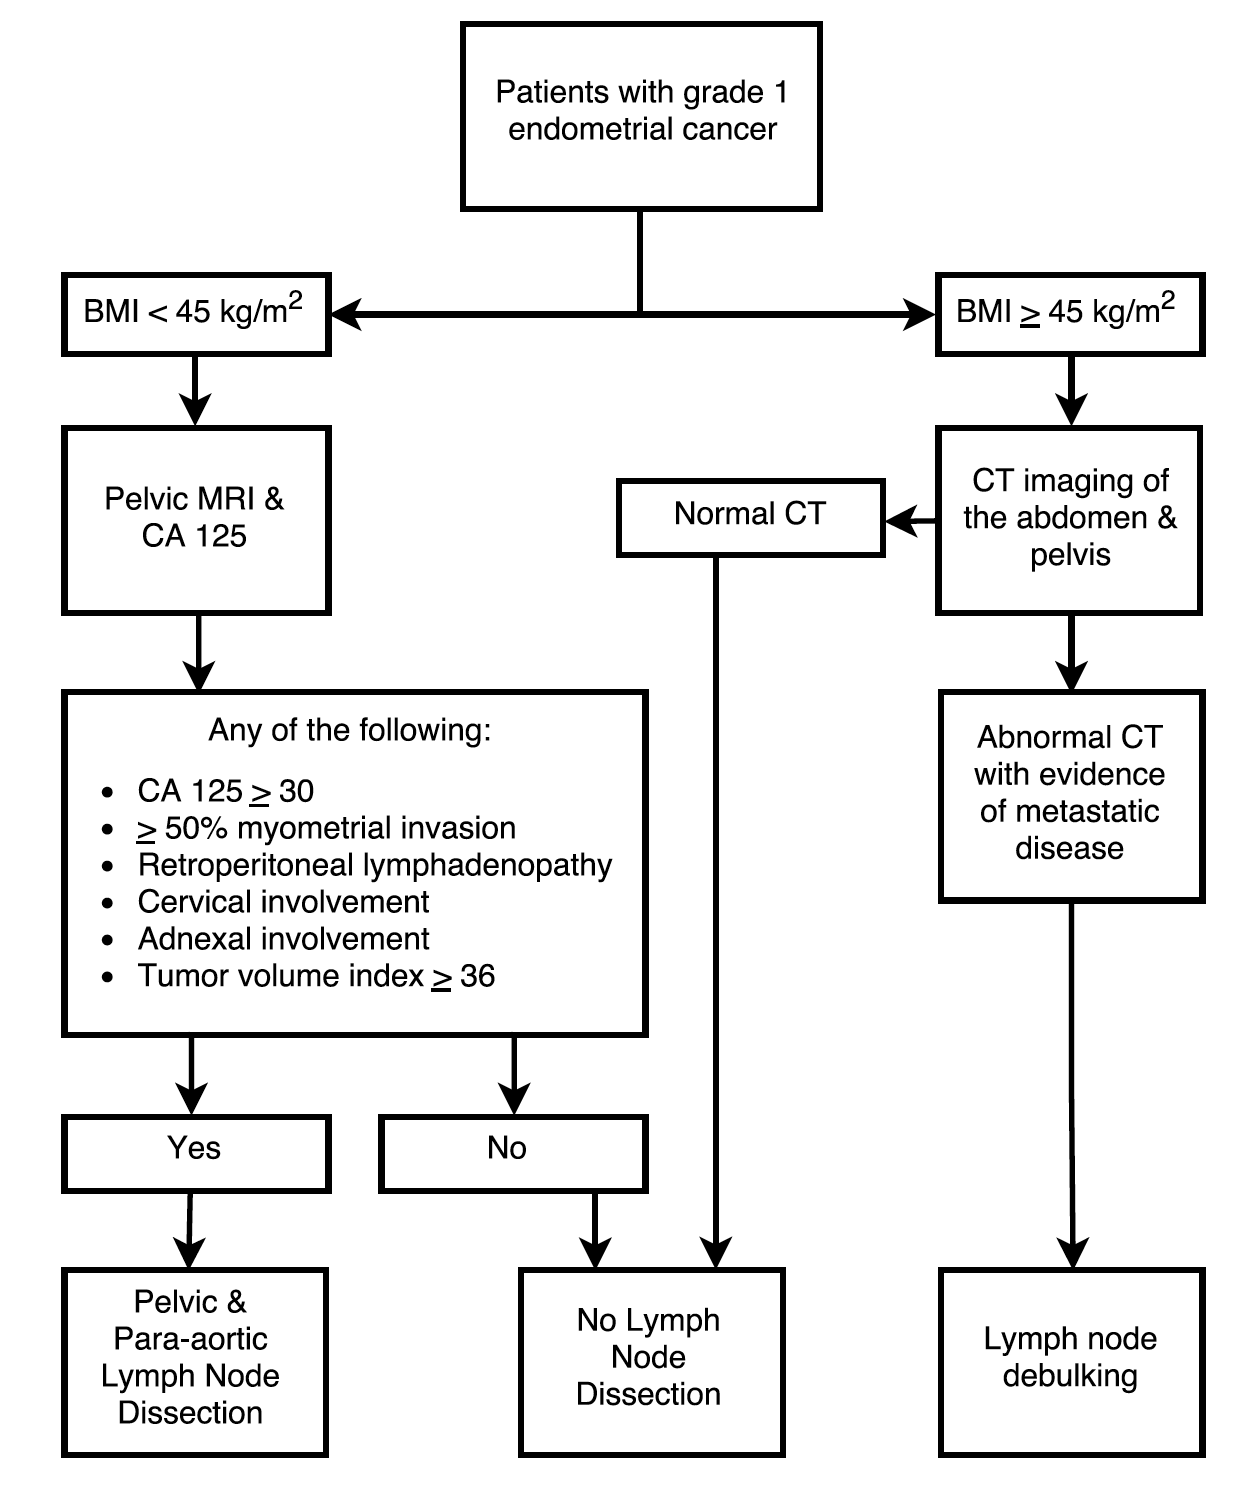

Supplement: inline-supplementary-material-1 [file inline-supplementary-material-1.docx]
