# Supplementary material
Source: HighWire-hosted journal article supplement (https://ijgc.bmj.com/content/29/1/102)
Supplement: inline-supplementary-material-3 [file inline-supplementary-material-3.docx]

**Appendix 3.** Postoperative questionnaire.

| **Compared to other surgeries of this type, how difficult was this surgery?** | | | | | | | |
| --- | --- | --- | --- | --- | --- | --- | --- |
| 1 | 2 | 3 | 4 | 5 | 6 | 7 | |
| Easiest possible |  |  | Average |  |  | | Hardest possible |

| **Did you perform any additional steps to complete the planned procedure? If yes, what were they?** |
| --- |

|  |  |  |  |  |  | |  |
| --- | --- | --- | --- | --- | --- | --- | --- |
| **From open to closing, how long how long did this case take? If not average, how much longer or shorter?** | | | | | | | |
| Shorter | Average | | | | | Longer | |

| **Did you need to modify the surgery mid-procedure due to difficulty?** |
| --- |

| **How mentally stressful was this case?** | | | | | | |
| --- | --- | --- | --- | --- | --- | --- |
| 1 | 2 | 3 | 4 | 5 | 6 | 7 |
| Not stressful at all |  |  | Average |  |  | Extremely stressful |

| **How physically fatiguing was this case?** | | | | | | |
| --- | --- | --- | --- | --- | --- | --- |
| 1 | 2 | 3 | 4 | 5 | 6 | 7 |
| Not fatiguing at all |  |  | Average |  |  | Extremely fatiguing |

| **Compared to average, how much skilled assistance did you utilize during the procedure?** | | |
| --- | --- | --- |
| Less than usual | Average | More than usual |

| **Compared to average, how was the atmosphere in the operating room during the procedure?** | | | | | | |
| --- | --- | --- | --- | --- | --- | --- |
| 1 | 2 | 3 | 4 | 5 | 6 | 7 |
| Very relaxed |  |  | Average |  |  | Very tense |

| **Compared to average, rate each aspect of the procedure, if applicable?** | | | | | | |
| --- | --- | --- | --- | --- | --- | --- |
| *Patient positioning* | | | | | | |
| 1 | 2 | 3 | 4 | 5 | 6 | 7 |
| Average difficulty |  |  | Moderately increased difficulty |  |  | Substantially increased difficulty |
| *Trocar placement OR creation & management of laparotomy incision* | | | | | | |
| 1 | 2 | 3 | 4 | 5 | 6 | 7 |
| Average difficulty |  |  | Moderately increased difficulty |  |  | Substantially increased difficulty |

| *Achieving & maintaining adequate visualization / access to relevant anatomy* | | | | | | |
| --- | --- | --- | --- | --- | --- | --- |
| 1 | 2 | 3 | 4 | 5 | 6 | 7 |
| Average difficulty |  |  | Moderately increased difficulty |  |  | Substantially increased difficulty |
|  |  |  |  |  |  |  |
| *Hysterectomy & bilateral salpingo-oophorectomy* | | | | | | |
| 1 | 2 | 3 | 4 | 5 | 6 | 7 |
| Average difficulty |  |  | Moderately increased difficulty |  |  | Substantially increased difficulty |

| *Lymphadenectomy* | | | | | | |
| --- | --- | --- | --- | --- | --- | --- |
| 1 | 2 | 3 | 4 | 5 | 6 | 7 |
| Average difficulty |  |  | Moderately increased difficulty |  |  | Substantially increased difficulty |
| *Patient tolerance of general anesthesia* | | | | | | |
| 1 | 2 | 3 | 4 | 5 | 6 | 7 |
| Average difficulty |  |  | Moderately increased difficulty |  |  | Substantially increased difficulty |
